# Supplementary material
Source: PubMed Central journal article supplement (PMC5210709)
Supplement: supp_pp.16.00813_PP2016-00813R1_Supplemental_Table_S1.pdf [file supp_pp.16.00813_PP2016-00813R1_Supplemental_Table_S1.pdf]

1 **Supplemental Table S1.** Summary of the environmental conditions tested.

| ENV <sup>a</sup> | N <sup>b</sup> | Time <sup>c</sup>         | Location        | Light conditions                         | Temperature (day/night) | Vern. <sup>d</sup> |
|------------------|----------------|---------------------------|-----------------|------------------------------------------|-------------------------|--------------------|
| 1                | 3              | April - July 2012         | Aberystwyth, UK | natural; supplemented for 20h            | 22°C/20°C               | no                 |
| 2                | 3              | April - July 2012         | Aberystwyth, UK | natural; supplemented for 20h            | 22°C/20°C               | yes                |
| 3                | 5              | May - July 2014           | Norwich, UK     | natural                                  | natural                 | no                 |
| 4                | 5              | September - November 2014 | Norwich, UK     | natural; supplemented for 16h (400w HPS) | minimum 18°C/11.5°C     | no                 |
| 5                | 5              | March - May 2015          | Norwich, UK     | natural                                  | natural                 | no                 |

2 <sup>a</sup>Environment

3 <sup>b</sup>Number of F<sub>4:5</sub> individuals tested

4 <sup>c</sup>Time period of experiment

5 <sup>d</sup>Vernalization
