# Supplementary material
Source: PubMed Central journal article supplement (PMC5210709)
Supplement: supp_pp.16.00813_PP2016-00813R1_Supplemental_Table_S2.pdf [file supp_pp.16.00813_PP2016-00813R1_Supplemental_Table_S2.pdf]

- 1 **Supplemental Table S2.** Significant QTLs from interval mapping of binary classification of
- 2 flowering time phenotypes in the ABR6 x Bd21 F<sub>4:5</sub> families.

| ENV <sup>a</sup> | Chr <sup>b</sup> | cM    | EWT <sup>c</sup> | LOD  |
|------------------|------------------|-------|------------------|------|
| 1                | Bd1              | 298.0 | 3.84             | 13.1 |
| 5                | Bd3              | 302.0 | 3.64             | 5.08 |

- 3 <sup>a</sup>Environment (see Supplemental Table S1)
- 4 <sup>b</sup>Chromosome
- 5 <sup>c</sup>Experiment-wide permutation threshold
