# Supplementary material
Source: PubMed Central journal article supplement (PMC5210709)
Supplement: supp_pp.16.00813_PP2016-00813R1_Supplemental_Table_S4.pdf [file supp_pp.16.00813_PP2016-00813R1_Supplemental_Table_S4.pdf]

- 1 **Supplemental Table S4.** Significant QTLs from composite interval mapping of transformed  
 2 flowering time phenotypes in the ABR6 x Bd21 F<sub>4:5</sub> families (T1).

| ENV <sup>a</sup> | Chr <sup>b</sup> | cM    | EWT <sup>c</sup> | LOD  | AEE <sup>d</sup> | PVE <sup>e</sup> |
|------------------|------------------|-------|------------------|------|------------------|------------------|
| 2                | Bd1              | 297.6 | 3.14             | 7.50 | 0.95             | 19.2%            |
| 2                | Bd2              | 409.0 | 3.14             | 3.35 | 0.56             | 6.6%             |
| 2                | Bd3              | 93.2  | 3.14             | 5.61 | 0.82             | 13.5%            |
| 4                | Bd3              | 60.8  | 3.20             | 5.12 | 4.13             | 16.9%            |
| 5                | Bd1              | 297.6 | 3.35             | 5.52 | 8.88             | 48.0%            |

- 3 <sup>a</sup>Environment (see Supplemental Table S1)  
 4 <sup>b</sup>Chromosome  
 5 <sup>c</sup>Experiment-wide permutation threshold  
 6 <sup>d</sup>Additive effect estimate for transformed phenotypes  
 7 <sup>e</sup>Percent of phenotypic variance explained
