# Supplementary material
Source: PubMed Central journal article supplement (PMC5210709)
Supplement: supp_pp.16.00813_PP2016-00813R1_Supplemental_Table_S6.pdf [file supp_pp.16.00813_PP2016-00813R1_Supplemental_Table_S6.pdf]

1 **Supplemental Table S6.** Summary of the structural variation between Bd21 and ABR6 for  
2 the flowering regulators Bradi1g48830 (*FT*), Bradi3g10010 (*VRN2*), and Bradi1g08340  
3 (*VRN1*).

| Gene ID      | Name         | Position <sup>a</sup> | Polymorphism <sup>b</sup> | Location   | Notes |
|--------------|--------------|-----------------------|---------------------------|------------|-------|
| Bradi1g48830 | <i>FT</i>    | -1986                 | SNP (A to G)              | promoter   |       |
|              |              | -1184                 | SNP (T to G)              | promoter   |       |
|              |              | -1165                 | 1bp deletion              | promoter   |       |
|              |              | -1080                 | 2bp deletion              | promoter   |       |
|              |              | -590                  | 33bp deletion             | promoter   |       |
|              |              | 1242                  | 2bp insertion             | 3' UTR     |       |
|              |              | 1257                  | 4bp insertion             | 3' UTR     |       |
|              |              | 1616                  | SNP (A to C)              | 3' UTR     |       |
|              |              | +455                  | SNP (G to A)              | terminator |       |
|              |              | +709                  | SNP (A to C)              | terminator |       |
|              |              | +901                  | 1bp deletion              | terminator |       |
|              |              | +1837                 | 1bp insertion             | terminator |       |
|              |              | +1905                 | 1bp insertion             | terminator |       |
|              |              | +1915                 | SNP (A to G)              | terminator |       |
|              |              | +1995                 | 2bp deletion              | terminator |       |
| Bradi3g10010 | <i>VRN2</i>  | -1949                 | SNP (A to G)              | promoter   |       |
|              |              | -1918                 | SNP (A to T)              | promoter   |       |
|              |              | -1917                 | SNP (A to T)              | promoter   |       |
|              |              | -1916                 | SNP (A to T)              | promoter   |       |
|              |              | -1915                 | SNP (A to C)              | promoter   |       |
|              |              | -1914                 | SNP (G to C)              | promoter   |       |
|              |              | -1912                 | SNP (A to G)              | promoter   |       |
|              |              | -1904                 | SNP (G to C)              | promoter   |       |
|              |              | -1900                 | SNP (C to T)              | promoter   |       |
|              |              | -1896                 | 1bp insertion             | promoter   |       |
|              |              | -1881                 | SNP (A to G)              | promoter   |       |
|              |              | -1864                 | SNP (C to G)              | promoter   |       |
|              |              | -1862                 | SNP (G to T)              | promoter   |       |
|              |              | -1861                 | SNP (C to A)              | promoter   |       |
|              |              | -1851                 | SNP (T to C)              | promoter   |       |
|              |              | -1831                 | SNP (A to G)              | promoter   |       |
|              |              | -1758                 | SNP (T to G)              | promoter   |       |
|              |              | -1718                 | SNP (G to A)              | promoter   |       |
|              |              | -1511                 | SNP (G to T)              | promoter   |       |
|              |              | -1425                 | 84bp deletion             | promoter   |       |
| -1405        | SNP (G to C) | promoter              |                           |            |       |
| -1128        | SNP (T to C) | promoter              |                           |            |       |
| -1123        | SNP (A to T) | promoter              |                           |            |       |

|       |                |              |                        |
|-------|----------------|--------------|------------------------|
| -1026 | SNP (C to G)   | promoter     |                        |
| -866  | SNP (T to C)   | promoter     |                        |
| -754  | SNP (G to C)   | promoter     |                        |
| -746  | SNP (C to G)   | promoter     |                        |
| -616  | SNP (T to C)   | promoter     |                        |
| -489  | 1bp deletion   | promoter     |                        |
| -409  | SNP (A to G)   | promoter     |                        |
| -232  | SNP (T to C)   | promoter     |                        |
| -196  | SNP (C to T)   | promoter     |                        |
| 573   | SNP (C to G)   | intron       |                        |
| 594   | SNP (T to C)   | intron       |                        |
| 692   | 37bp deletion  | intron       |                        |
| 736   | SNP (G to A)   | intron       |                        |
| 745   | SNP (C to T)   | intron       |                        |
| 774   | 22bp insertion | intron       |                        |
| 825   | SNP (C to T)   | intron       |                        |
| 903   | 1bp insertion  | intron       |                        |
| 952   | SNP (C to T)   | intron       |                        |
| 958   | SNP (C to T)   | intron       |                        |
| 1263  | SNP (A to G)   | intron       |                        |
| 1354  | 1bp insertion  | intron       |                        |
| 1446  | SNP (A to G)   | intron       |                        |
| 1463  | SNP (A to G)   | intron       |                        |
| 1616  | SNP (C to T)   | intron       |                        |
| 1733  | SNP (C to G)   | exon2 CDS    | non-synonymous (M127I) |
| 1922  | SNP (T to C)   | exon2 CDS    | synonymous (P190P)     |
| 2051  | SNP (T to C)   | exon2 3' UTR |                        |
| 2064  | SNP (A to G)   | exon2 3' UTR |                        |
| 2166  | SNP (A to G)   | exon2 3' UTR |                        |
| 2183  | SNP (T to C)   | exon2 3' UTR |                        |
| +62   | SNP (G to A)   | terminator   |                        |
| +63   | SNP (A to C)   | terminator   |                        |
| +239  | SNP (T to C)   | terminator   |                        |
| +251  | SNP (G to A)   | terminator   |                        |
| +683  | SNP (T to A)   | terminator   |                        |
| +807  | SNP (A to C)   | terminator   |                        |
| +1022 | 1bp insertion  | terminator   |                        |
| +1030 | SNP (G to A)   | terminator   |                        |
| +1062 | SNP (A to C)   | terminator   |                        |
| +1141 | SNP (T to G)   | terminator   |                        |
| +1199 | SNP (C to A)   | terminator   |                        |
| +1315 | SNP (G to C)   | terminator   |                        |
| +1371 | SNP (G to C)   | terminator   |                        |

|              |             |       |               |            |
|--------------|-------------|-------|---------------|------------|
|              |             | +1398 | SNP (T to G)  | terminator |
|              |             | +1445 | SNP (G to A)  | terminator |
|              |             | +1846 | 1bp insertion | terminator |
|              |             | +1964 | 1bp deletion  | terminator |
| Bradi1g08340 | <i>VRNI</i> | -1908 | 1bp insertion | promoter   |
|              |             | -816  | SNP (C to G)  | promoter   |
|              |             | -368  | SNP (G to A)  | promoter   |
|              |             | 480   | SNP (G to C)  | intron     |
|              |             | 1020  | 3bp insertion | intron     |
|              |             | 1259  | SNP (G to T)  | intron     |
|              |             | 4273  | SNP (A to C)  | intron     |
|              |             | 4574  | SNP (C to T)  | intron     |
|              |             | 5287  | SNP (A to G)  | intron     |
|              |             | 7159  | SNP (C to T)  | intron     |
|              |             | 7757  | SNP (C to G)  | intron     |
|              |             | 8265  | SNP (G to T)  | intron     |

---

4 <sup>a</sup>Based on Bd21 reference sequence (Version 3)

5 <sup>b</sup>ABR6 relative to Bd21 reference sequence (Version 3)
