# Supplementary material
Source: PubMed Central journal article supplement (PMC5210709)
Supplement: supp_pp.16.00813_PP2016-00813R1_Supplemental_Table_S7.pdf [file supp_pp.16.00813_PP2016-00813R1_Supplemental_Table_S7.pdf]

- 1 **Supplemental Table S7.** Five cleaved amplified polymorphic sequences (CAPS) markers  
 2 included in the ABR6 x Bd21 genetic map design. Marker names consist of the  
 3 corresponding chromosome and physical position in the Bd21 reference genome (Version 3).  
 4 Synonymous names refer to Barbieri *et al.* 2012.

| Marker       | Synonymous name | Primers (forward; reverse)                        | Temp. <sup>a</sup> | Restriction enzyme |
|--------------|-----------------|---------------------------------------------------|--------------------|--------------------|
| Bd1_25420784 | Bradi1g29890    | GCCAGAGCCAGTGCTCCGGCT;<br>CCTTCTCGCCGCTCTATCC     | 64°C               | MseI               |
| Bd1_49774594 | BdWBE217        | CGGTGCGGGTACAGGTGCTA;<br>TCCGCTCAGTATGCCAAGTCAA   | 64°C               | TaqI               |
| Bd2_47321006 | BdWBE106        | GTGCCCCAACTGCCTCTGCT;<br>CGCCGTTGATGATGTTGGTGA    | 64°C               | HaeII              |
| Bd3_13534807 | BdWBE104        | TCTTTCTCCTTGCTGCTCTACTCG;<br>TGCCTTGCCAAAACATCATC | 64°C               | BseGI              |
| Bd3_14534416 | Bradi3g16340    | GTGGCCGTCTCTCTCAAC;<br>ACCCTGGCTCATGTCAAGTC       | 64°C               | PciI               |

- 5 <sup>a</sup>Annealing temperature
