# Supplementary material
Source: PubMed Central journal article supplement (PMC5210709)

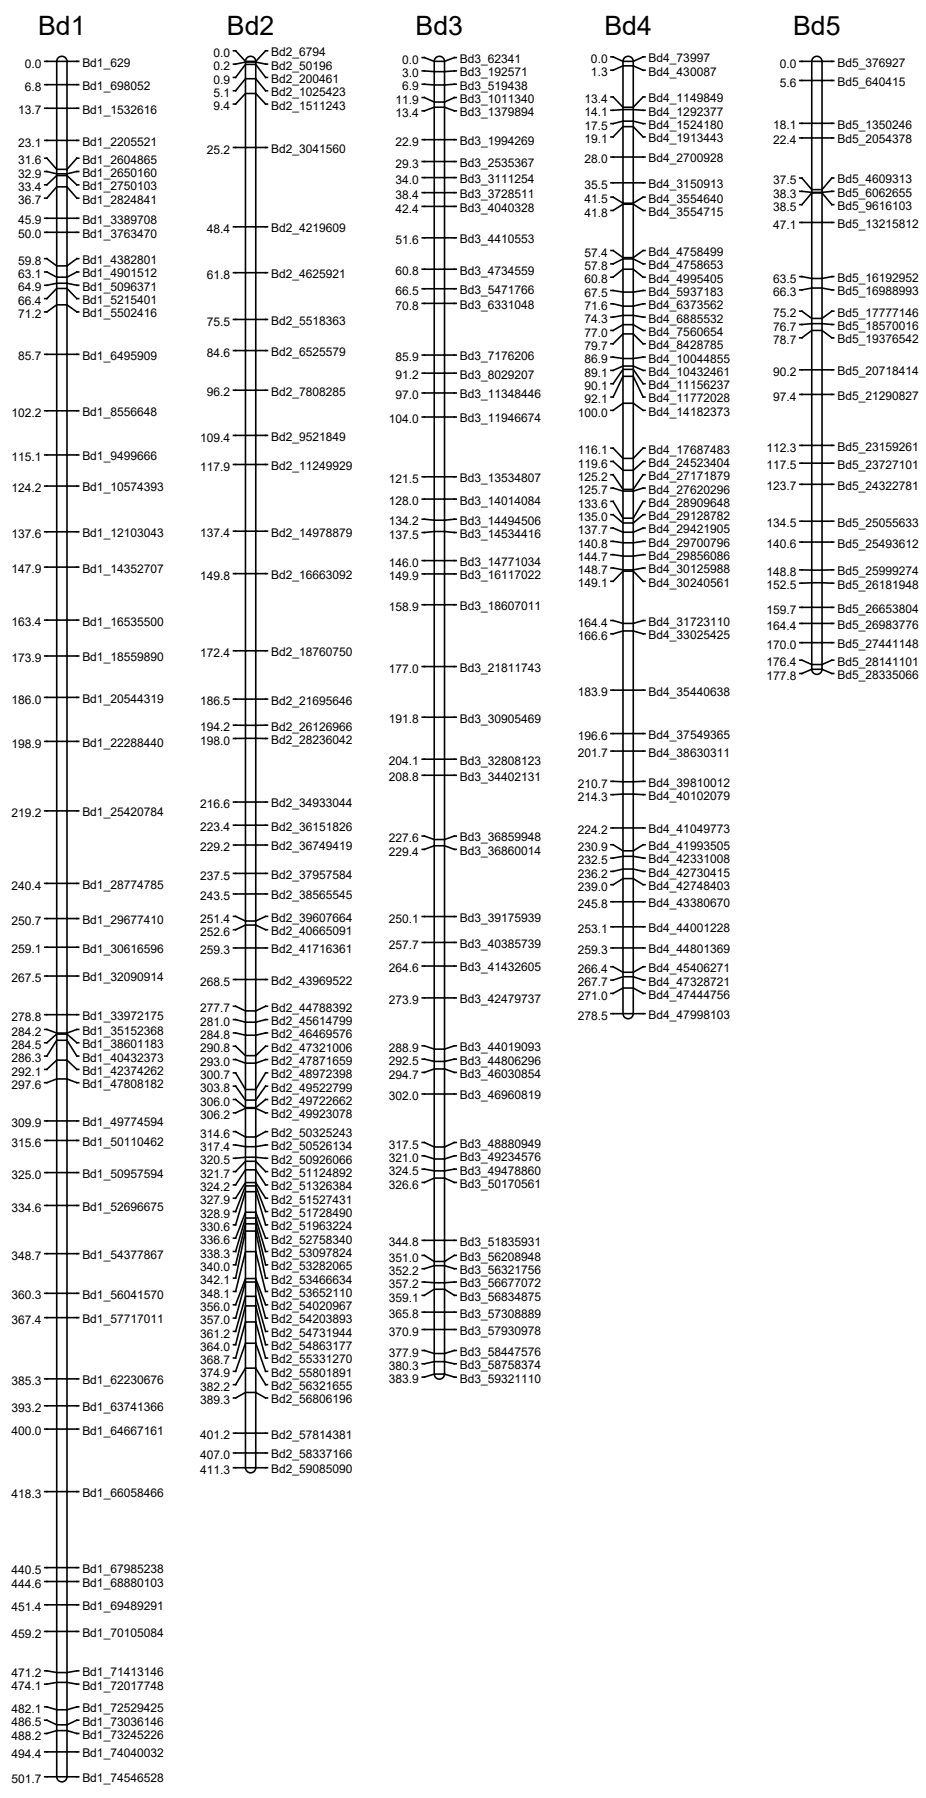

Supplement: supp_pp.16.00813_PP2016-00813R1_Supplemental_Figure_1.pdf [file supp_pp.16.00813_PP2016-00813R1_Supplemental_Figure_1.pdf]
